# Supplementary material for: HIV-1 Drug Resistance, Distribution of Subtypes, and Drug Resistance-Associated Mutations in Virologic Failure Individuals in Chengdu, Southwest China, 2014-2016
Source: PubMed Central journal article supplement (PMC7128060; doi:10.1155/2020/5894124), 2020-03-23
Supplement: 5894124.f1.pdf [file 5894124.f1.pdf]

**Supplementary material**

S Table 1. Prevalence of DRMs in HIV-1 individuals with virologic failure in Chengdu from 2014 to 2016

| Mutations    | Prevalence of DR (n=245) |      |      |       |       | HIV-1 drug resistance level |              |              |              |            |              |              |              |
|--------------|--------------------------|------|------|-------|-------|-----------------------------|--------------|--------------|--------------|------------|--------------|--------------|--------------|
|              | 2014                     | 2015 | 2016 | Total | %     |                             |              |              |              |            |              |              |              |
| <b>PIs</b>   |                          |      |      |       |       | <b>LPV/r</b>                | <b>DRV/r</b> | <b>FPV/r</b> | <b>IDV/r</b> | <b>NFV</b> | <b>SQV/r</b> | <b>TPV/r</b> | <b>ATV/r</b> |
| M46I         | 1                        | 0    | 0    | 1     | 0.41  |                             |              |              |              |            |              |              |              |
| I47A         | 1                        | 0    | 0    | 1     | 0.41  | H                           | I            | H            | L            | H          | L            | I            | L            |
| I50V         | 1                        | 0    | 0    | 1     | 0.41  |                             |              |              |              |            |              |              |              |
| L10I/V       | 4                        | 14   | 14   | 32    | 13.06 | S                           | S            | S            | S            | S          | S            | S            | S            |
| A71I/T/V     | 5                        | 20   | 3    | 28    | 11.43 | S                           | S            | S            | S            | S          | S            | S            | S            |
| K20I/R       | 1                        | 1    | 24   | 26    | 10.61 | S                           | S            | S            | S            | P          | S            | S            | S            |
| L33F/S       | 1                        | 2    | 1    | 4     | 1.63  | S                           | S            | P/S          | S            | S          | S            | P/S          | S            |
| T74S         | 1                        | 2    | 1    | 4     | 1.63  | S                           | S            | S            | S            | L          | S            | S            | S            |
| Q58E         | 1                        | 1    | 1    | 3     | 1.22  | S                           | S            | S            | S            | S          | S            | L            | S            |
| V82I         | 0                        | 0    | 2    | 2     | 0.82  | S                           | S            | S            | S            | S          | S            | S            | S            |
| <b>NRTIs</b> |                          |      |      |       |       | <b>3TC</b>                  | <b>ABC</b>   | <b>AZT</b>   | <b>D4T</b>   | <b>TDF</b> | <b>DDI</b>   | <b>FTC</b>   |              |
| M184I/V      | 22                       | 74   | 50   | 146   | 59.59 | H                           | L            | S            | S            | S          | P            | H            |              |
| K65R         | 9                        | 40   | 20   | 69    | 28.16 | I/H                         | I/H          | S            | I/H          | I/H        | I/H          | I/H          |              |
| D67N/G       | 11                       | 24   | 12   | 47    | 19.18 | S                           | I/H          | S            | L/I          | S          | L/I          | S            |              |
| K70E/K/R     | 8                        | 19   | 15   | 42    | 17.14 | L/I                         | L/I          | S/L          | L/I          | L/I        | L/I          | L/I          |              |
| Y115F        | 5                        | 18   | 14   | 37    | 15.10 | S                           | H            | S            | S            | S/P        | S            | S            |              |
| L74I/V       | 4                        | 14   | 9    | 27    | 11.02 | S                           | H            | S            | S            | S          | H            | S            |              |
| T215I/Y      | 5                        | 9    | 6    | 20    | 8.16  | S                           | I/H          | I/H          | I/H          | S          | I/H          | S            |              |

|          |   |    |   |    |      |   |   |     |     |     |     |   |
|----------|---|----|---|----|------|---|---|-----|-----|-----|-----|---|
| V75I/L/M | 5 | 10 | 4 | 19 | 7.76 | S | S | S   | S   | S   | P   | S |
| A62V     | 1 | 6  | 7 | 14 | 5.71 | S | S | S   | S   | S   | S   | S |
| K219E/Q  | 2 | 7  | 4 | 13 | 5.31 | S | S | P   | P   | S   | S   | S |
| M41L     | 3 | 5  | 4 | 12 | 4.90 | S | S | S/L | S/L | S   | S/L | S |
| T69N/D   | 3 | 7  | 1 | 11 | 4.49 | S | S | S   | S   | S   | P   | S |
| L210W    | 2 | 3  | 4 | 9  | 3.67 | S | S | S   | S   | L/I | S   | S |
| E44D     | 0 | 0  | 2 | 2  | 0.82 | S | S | S   | S   | S   | S   | S |

| <b>NNRTIs</b>   |    |    |    |    |       | <b>EFV</b> | <b>NVP</b> | <b>RPV</b> | <b>ETR</b> |
|-----------------|----|----|----|----|-------|------------|------------|------------|------------|
| K103N           | 12 | 43 | 37 | 92 | 37.55 | H          | H          | S          | S/P        |
| G190A/E/K/Q/S/V | 10 | 35 | 25 | 70 | 28.57 | L/H        | L/H        | L/H        | L/H        |
| V179I/D/E/T     | 10 | 32 | 26 | 68 | 27.76 | P          | P          | P          | P/L        |
| V106A/I/M       | 7  | 31 | 26 | 64 | 26.12 | I/H        | I/H        | S          | S          |
| Y181C/V         | 11 | 23 | 12 | 46 | 18.78 | I/H        | I/H        | I/H        | I/H        |
| K101E/H/P       | 1  | 22 | 13 | 36 | 14.69 | L/H        | L/H        | L/H        | L/H        |
| F227L           | 5  | 9  | 5  | 19 | 7.76  | S          | S          | S          | S          |
| V90I            | 5  | 13 | 0  | 18 | 7.35  | S          | S          | S          | S          |
| V108I           | 2  | 5  | 9  | 16 | 6.53  | S          | S          | S          | S          |
| E138A/G/R/K/Q   | 3  | 7  | 5  | 15 | 6.12  | S          | S          | L          | P          |
| H221Y           | 1  | 6  | 7  | 14 | 5.71  | S          | S          | S          | S          |
| Y188C/H/L       | 3  | 6  | 5  | 14 | 5.71  | H          | H          | H          | P/L        |
| L100I           | 0  | 7  | 3  | 10 | 4.08  | S          | S          | I/H        | I/H        |
| M230L           | 2  | 6  | 2  | 10 | 4.08  | S          | S          | I/H        | I/H        |
| P225H           | 2  | 3  | 5  | 10 | 4.08  | S          | S          | S          | S          |
| A98G            | 2  | 5  | 1  | 8  | 3.27  | S          | S          | L          | P          |

NRTIs: Nucleoside reverse transcriptase inhibitors, NNRTIs: Non-nucleoside reverse transcriptase inhibitors, PIs: Protease Inhibitors,  
S: susceptible, P: potential low-level resistance, L: low-level resistance, I: intermediate resistance, H: high-level resistance,  
3TC: Lamivudine, ABC: Abacavir, AZT: Zidovudine, D4T: Stavudine, TDF: Tenofovir, DDI : Didanosine, FTC: Emtricitabine, EFV: Efavirenz, NVP: Nevirapine,  
ETR: Etravirine, RPV: Rilpivirine, LPV/r: Lopinavir, ATV/r: Atazanavir, DRV/r: Darunavir, FPV/r: Fosamprenavir, IDV/r: Indinavir, NFV: Nelfinavir, SQV/r:  
Saquinavir, TPV/r: Tipranavir

S Table2. Distribution of HIV-1 DRMs in CRF01\_AE and CRF07\_BC

| Mutations       | CRF01_AE |       | CRF07_BC |       |
|-----------------|----------|-------|----------|-------|
|                 | Cases    | %     | Cases    | %     |
| <b>NRTIs</b>    |          |       |          |       |
| M184I/V         | 107      | 43.67 | 33       | 13.47 |
| K65R            | 45       | 18.37 | 20       | 8.16  |
| D67N/G          | 40       | 16.33 | 6        | 2.45  |
| K70E/K/R        | 33       | 13.47 | 8        | 3.27  |
| Y115F           | 28       | 11.43 | 9        | 3.67  |
| L74I/V          | 20       | 8.16  | 6        | 2.45  |
| T215I/Y         | 16       | 6.53  | 3        | 1.22  |
| V75I/L/M        | 17       | 6.94  | 0        | -     |
| A62V            | 11       | 4.49  | 3        | 1.22  |
| K219E/Q         | 10       | 4.08  | 2        | 0.82  |
| M41L            | 8        | 3.27  | 1        | 0.41  |
| T69N/D          | 11       | 4.49  | 0        | -     |
| L210W           | 8        | 3.27  | 0        | -     |
| E44D            | 2        | 0.82  | 0        | -     |
| <b>NNRTIs</b>   |          |       |          |       |
| K103N           | 60       | 24.49 | 32       | 13.06 |
| G190A/E/K/Q/S/V | 52       | 21.22 | 15       | 6.12  |
| V179I/D/E/T     | 50       | 20.41 | 14       | 5.71  |
| V106A/I/M       | 44       | 17.96 | 18       | 7.35  |
| Y181C/V         | 35       | 14.29 | 9        | 3.67  |
| K101E/H/P       | 25       | 10.20 | 10       | 4.08  |
| F227L           | 9        | 3.67  | 9        | 3.67  |
| V90I            | 13       | 5.31  | 5        | 2.04  |
| V108I           | 13       | 5.31  | 3        | 1.22  |
| E138A/G/R/K/Q   | 12       | 4.90  | 1        | 0.41  |
| H221Y           | 11       | 4.49  | 2        | 0.82  |
| Y188C/H/L       | 10       | 4.08  | 4        | 1.63  |
| L100I           | 7        | 2.86  | 3        | 1.22  |
| M230L           | 7        | 2.86  | 2        | 0.82  |
| P225H           | 5        | 2.04  | 5        | 2.04  |
| A98G            | 8        | 3.27  | 0        | -     |
| <b>PIs</b>      |          |       |          |       |
| M46I            | 0        | -     | 1        | 0.41  |
| I47A            | 0        | -     | 1        | 0.41  |
| I50V            | 0        | -     | 1        | 0.41  |
| L10I/V          | 13       | 5.31  | 19       | 7.76  |
| A71I/T/V        | 1        | 0.41  | 27       | 11.02 |
| K20I/R          | 25       | 10.20 | 1        | 0.41  |

|        |   |      |   |      |
|--------|---|------|---|------|
| L33F/S | 3 | 1.22 | 1 | 0.41 |
| T74S   | 4 | 1.63 | 0 | -    |
| Q58E   | 0 | -    | 3 | 1.22 |
| V82I   | 0 | -    | 2 | 0.82 |

---

NRTIs: Nucleoside reverse transcriptase inhibitors, NNRTIs: Non-nucleoside reverse transcriptase inhibitors, PIs: Protease Inhibitors
